# Supplementary material
Source: MDPI journal article supplement (https://www.mdpi.com/2077-0472/12/12/2159)
Supplement: s1 [file s1]

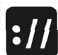

## SUPPORTING INFORMATION FOR:

Madrid-Solórzano, J.M., García-Alcaraz, J.L., Jiménez Macías, E. & Blanco Fernández, J. (2022). Sustainable Industrial Sotol Production in Mexico—A Life Cycle Assessment.

### Summary

This supporting information provides the primary empirical data on research from the sotol-producing firm.

|                                                                                                                                                                                                                                                                                                                  |                 |                                                                                                 |                             |
|------------------------------------------------------------------------------------------------------------------------------------------------------------------------------------------------------------------------------------------------------------------------------------------------------------------|-----------------|-------------------------------------------------------------------------------------------------|-----------------------------|
| <b>UNIVERSIDAD AUTÓNOMA DE CIUDAD JUÁREZ</b>                                                                                                                                                                                                                                                                     |                 |  <b>UACJ</b> |                             |
| <b>1. Contact information</b>                                                                                                                                                                                                                                                                                    |                 |                                                                                                 |                             |
| Pedro Herrera Pacheco (Sotol-maker)<br>5 Tragos company                                                                                                                                                                                                                                                          |                 | City: Ciudad Juárez, Chih.<br>e-mail: ariana@lasotolera.com                                     |                             |
| <b>2. Details about conducted research</b>                                                                                                                                                                                                                                                                       |                 |                                                                                                 |                             |
| <b>2.1 Research period</b>                                                                                                                                                                                                                                                                                       |                 |                                                                                                 |                             |
| One month                                                                                                                                                                                                                                                                                                        |                 |                                                                                                 |                             |
| <b>2.2 Processing type</b>                                                                                                                                                                                                                                                                                       |                 |                                                                                                 |                             |
| Industrial manufacturing                                                                                                                                                                                                                                                                                         |                 |                                                                                                 |                             |
| <b>2.3 The quantity of the finished product produced on the research period</b>                                                                                                                                                                                                                                  |                 |                                                                                                 |                             |
| The quantity processed of sotol pineapple biomass during the research period was equal to 15 tons, which is equivalent to approximately 1250 L of distilled spirit (45% Alc. Vol). After graduation of the total alcohol by volume, the quantity of finished product was 1806 bottles of 750 ml at 40% Alc. Vol. |                 |                                                                                                 |                             |
| <b>3. Inputs and Outputs</b>                                                                                                                                                                                                                                                                                     |                 |                                                                                                 |                             |
| <b>Harvest</b>                                                                                                                                                                                                                                                                                                   |                 |                                                                                                 |                             |
| <b>Stage description</b>                                                                                                                                                                                                                                                                                         | <b>Quantity</b> | <b>Units</b>                                                                                    | <b>Notes</b>                |
| <b>Inputs</b>                                                                                                                                                                                                                                                                                                    |                 |                                                                                                 |                             |
| <b>Draft animal (mule)</b>                                                                                                                                                                                                                                                                                       | 1               | pc.                                                                                             | Not considered in the study |
| <i>The period used</i>                                                                                                                                                                                                                                                                                           | 15              | hrs.                                                                                            |                             |

| 3. Inputs and Outputs                                                          |          |           |                             |
|--------------------------------------------------------------------------------|----------|-----------|-----------------------------|
| Harvest                                                                        |          |           |                             |
| Stage description                                                              | Quantity | Units     | Notes                       |
| Inputs                                                                         |          |           |                             |
| <b>Metal basket made of a bar of corrugated iron</b>                           | 4        | pcs.      | Not considered in the study |
| <i>The period used</i>                                                         | 15       | hrs.      |                             |
| <i>Average useful life</i>                                                     | 5        | yr.       |                             |
| <i>Weight</i>                                                                  | 4.60     | kg        |                             |
| <b>Axe</b>                                                                     | 3        | pcs.      | Not considered in the study |
| <i>The period used</i>                                                         | 15       | hrs.      |                             |
| <i>Average useful life</i>                                                     | 5        | yr.       |                             |
| <b>Bowie knife</b>                                                             | 3        | pcs.      | Not considered in the study |
| <i>The period used</i>                                                         | 15       | hrs.      |                             |
| <i>Average useful life</i>                                                     | 3        | yr.       |                             |
| <b>Shovel</b>                                                                  | 3        | pcs.      | Not considered in the study |
| <i>The period used</i>                                                         | 15       | hrs.      |                             |
| <i>Average useful life</i>                                                     | 3        | yr.       |                             |
| <b>Four wheels tipping trailer (axle number: 2)</b>                            | 1        | pc.       | Not considered in the study |
| <i>Average useful life</i>                                                     | 18       | yr.       |                             |
| <b>Pickup truck</b>                                                            | 1        | pc.       |                             |
| <i>Fuel consumption</i>                                                        | 70       | L         |                             |
| <i>Average useful life</i>                                                     | 15       | yr.       |                             |
| <b>The transport distance of <i>Dasyilirion</i> plants</b>                     | 512      | km        |                             |
| <b>Log truck (Kenworth T800)</b>                                               | 1        | pc.       |                             |
| <i>Average useful life</i>                                                     | 15       | yr.       |                             |
| <i>Fossil fuel (Diesel)</i>                                                    | 230      | L         |                             |
| Outputs                                                                        |          |           |                             |
| <b><i>Dasyilirion</i> leaves left in the place of the harvest</b>              | 0.5      | t         | Not considered in the study |
| Cooking                                                                        |          |           |                             |
| <b>50-hp steam boiler machine</b>                                              | 1        | pc.       |                             |
| <i>The operation hours of the steam boiler per 15 tons of sotol pineapples</i> | 45       | hrs.      |                             |
| <i>Average useful life</i>                                                     | 18       | yr.       |                             |
| <i>Average consumption of LPG</i>                                              | 80       | kg/hrs.   |                             |
| <i>Average consumption of water</i>                                            | 3,500    | L/45 hrs. |                             |

| 3. Inputs and Outputs                                      |             |                    |       |
|------------------------------------------------------------|-------------|--------------------|-------|
| Cooking                                                    |             |                    |       |
| Stage description                                          | Quantity    | Units              | Notes |
| <b>Inputs</b>                                              |             |                    |       |
| <i>Steam generation</i>                                    | 100         | kg/cm <sup>2</sup> |       |
| <i>Working pressure per hour</i>                           | 3           | kg/cm <sup>2</sup> |       |
| Technical details of steam boiler machine                  |             |                    |       |
| <i>Steam working pressure</i>                              | 8           | kg/cm <sup>2</sup> |       |
| <i>Steam output</i>                                        | 782         | kg/hr.             |       |
| <i>Electric motor</i>                                      | 1           | pc.                |       |
| <i>Capacity</i>                                            | 3           | hp                 |       |
|                                                            | 220YY/440 Y | V                  |       |
|                                                            | 8.4/4.2     | A                  |       |
|                                                            | 3485        | rpm                |       |
|                                                            | 60          | Hz                 |       |
| <b>Water pump motor</b>                                    | 1           | pc.                |       |
| <i>Capacity</i>                                            | 220/440     | V                  |       |
|                                                            | 7.4/3.7     | amp.               |       |
|                                                            | 3486        | rpm                |       |
|                                                            | 60          | Hz                 |       |
| <b>Supplementary equipment</b>                             |             |                    |       |
| <i>2000 L propane tank</i>                                 | 1           | pc.                |       |
| <i>Average useful life</i>                                 | 10          | yr.                |       |
| <i>2000 L water storage tank (made of stainless steel)</i> | 1           | pc.                |       |
| <i>Water filtration system</i>                             | 1           | pc.                |       |
| <i>Average useful life</i>                                 | 2           | yr.                |       |
| <i>Three-phase water pump</i>                              | 1           | pc                 |       |
| <i>Capacity</i>                                            | 50          | hp                 |       |
|                                                            | 3,600       | rpm                |       |
| <i>Average useful life</i>                                 | 20          | yr.                |       |
| <i>Schedule 40 steel pipe</i>                              | 60          | m                  |       |
| <i>Average useful life</i>                                 | 15          | yr.                |       |

| 3. Inputs and Outputs                       |                    |                    |       |
|---------------------------------------------|--------------------|--------------------|-------|
| Cooking                                     |                    |                    |       |
| Stage description                           | Quantity           | Units              | Notes |
| Inputs                                      |                    |                    |       |
| <b>Autoclave</b>                            |                    |                    |       |
| <i>Baking process per 8 hrs.</i>            | 3,000              | kg                 |       |
| <i>The operation hours of the Autoclave</i> | 40                 | hrs.               |       |
| <i>Steam consumption per hour</i>           | 100                | kg/cm <sup>2</sup> |       |
| <i>Average useful life</i>                  | 30                 | yr.                |       |
| Outputs                                     |                    |                    |       |
| <i>Wet sludge from autoclave</i>            | 19                 | L/45 hrs.          |       |
| <i>Water drained from autoclave</i>         | 20                 | L/45 hrs.          |       |
| Milling                                     |                    |                    |       |
| Stage description                           | Quantity           | Units              | Notes |
| Inputs                                      |                    |                    |       |
| <b>Mill</b>                                 | 1                  | pc.                |       |
| <i>Cutting capacity</i>                     | 1,000              | kg                 |       |
| <i>The operation hours of the mill</i>      | 15                 | hrs.               |       |
| <i>Electric motor</i>                       | 1                  | pc.                |       |
|                                             | 10                 | hp                 |       |
|                                             | 208 – 220 /<br>440 | V                  |       |
|                                             | 27/13.5            | A                  |       |
|                                             | 1760               | rpm                |       |
| <i>Water consumption</i>                    | 2,500              | L/15 hrs.          |       |
| <i>Average useful life</i>                  | 10                 | yr.                |       |
| <i>Stainless Steel tanks</i>                | 250                | kg                 |       |
| <i>Average useful life</i>                  | 20                 | yr.                |       |
| <i>Capacity</i>                             | 5,000              | L                  |       |
| <i>Water pump</i>                           | 1/2                | hp                 |       |
|                                             | 9.10/3.70          | A                  |       |
|                                             | 60                 | Hz                 |       |
| <i>The operation hours of the mill</i>      | 15                 | hrs.               |       |
| <i>Average useful life</i>                  | 5                  | yr.                |       |
| <i>Transfer pumps</i>                       | 1                  | pc.                |       |
| <i>Capacity</i>                             | 1/2                | hp                 |       |
|                                             | 9.10/3.70          | amp.               |       |
| <i>Average useful life</i>                  | 3                  | yr.                |       |

| 3. Inputs and Outputs                                                      |            |                     |                                                |
|----------------------------------------------------------------------------|------------|---------------------|------------------------------------------------|
| Milling                                                                    |            |                     |                                                |
| Stage description                                                          | Quantity   | Units               | Notes                                          |
| Inputs                                                                     |            |                     |                                                |
| <i>Flexible PVC tubing (use in applications for the beverage industry)</i> | 43         | m                   |                                                |
| <i>Stainless steel tank (weight)</i>                                       | 16         | kg                  | Capacity: 300 L                                |
| Outputs                                                                    |            |                     |                                                |
| <b>Sotol bagasse (waste)</b>                                               | 12         | t                   |                                                |
| Fermentation                                                               |            |                     |                                                |
| Inputs                                                                     |            |                     |                                                |
| <b>Fermentation tank</b>                                                   | 3          | pcs.                |                                                |
| <i>Stainless steel tank</i>                                                | 62         | kg                  | Weight                                         |
| <i>Capacity</i>                                                            | 1,000      | L                   |                                                |
| <i>Steam consumption per hour</i>                                          | 100        | kg/cm <sup>2</sup>  |                                                |
| <i>Average useful life</i>                                                 | 20         | yr.                 |                                                |
| Distillation                                                               |            |                     |                                                |
| Inputs                                                                     |            |                     |                                                |
| <b>Stainless Steel alembic distiller</b>                                   | 1          | pc.                 | Made of sheet metal stainless steel caliber 16 |
| <i>Capacity</i>                                                            | 1000       | L                   |                                                |
| <i>Weight</i>                                                              | 210        | kg                  |                                                |
| <i>Distillation time</i>                                                   | 25         | hrs.                |                                                |
| <i>Steam consumption per hour</i>                                          | 100        | kg/ cm <sup>2</sup> |                                                |
| <i>Average useful life</i>                                                 | 20         | yr.                 |                                                |
| <b>Hydrometer</b>                                                          | 1          | pc.                 |                                                |
| <i>Average useful life</i>                                                 | 10         | yr.                 |                                                |
| <b>Cooling tower system</b>                                                |            |                     |                                                |
| <i>Electric motor</i>                                                      | 3          | hp                  |                                                |
|                                                                            | 220YY/440Y | V                   |                                                |
|                                                                            | 8.4/4.2    | A                   |                                                |
|                                                                            | 3485       | rpm                 |                                                |
|                                                                            | 60         | Hz                  |                                                |
| <i>Water pump</i>                                                          | 1.5        | hp                  |                                                |
|                                                                            | 1,119      | kW                  |                                                |
|                                                                            | 60         | Hz                  |                                                |

| 3. Inputs and Outputs                                           |          |              |                                                          |
|-----------------------------------------------------------------|----------|--------------|----------------------------------------------------------|
| Distillation                                                    |          |              |                                                          |
| Stage description                                               | Quantity | Units        | Notes                                                    |
| Inputs                                                          |          |              |                                                          |
| <b>Cooling tower system</b>                                     |          |              |                                                          |
| <i>PVC tubing 2"</i>                                            | 42       | m            |                                                          |
| <i>Galvanized steel sheet</i>                                   | 84       | kg           | Weight                                                   |
| <i>Fiber glass</i>                                              | 48       | kg           | Weight                                                   |
| <i>Low density polypropylene-panels</i>                         | 18       | kg           | Weight                                                   |
| <i>Water consumption</i>                                        | 900      | L            |                                                          |
| <i>Average useful life</i>                                      | 15       | yr.          |                                                          |
| Bottling                                                        |          |              |                                                          |
| <b>Stainless steel tanks</b>                                    | 2        | pcs.         |                                                          |
| <i>Capacity</i>                                                 | 1000     | L            |                                                          |
| <i>Weight</i>                                                   | 58.6     | kg           |                                                          |
| <i>Average useful life</i>                                      | 20       | yr.          |                                                          |
| <b>Oak Casks</b>                                                | 5        | pcs.         | Cask with six dip-galvanized hoops                       |
| <i>The transportation of oak casks by truck</i>                 | 1,628    | km           | Distance travelled                                       |
| <i>Capacity</i>                                                 | 180      | L            |                                                          |
| <i>Average useful life</i>                                      | 15       | yr.          |                                                          |
| <i>The loss of distilled liquor during aging in oak barrels</i> | 10       | L            | Period: four months to rested sotol                      |
| <i>The loss of distilled liquor during aging in oak barrels</i> | 40       | L            | Period: fourteen to aged sotol                           |
| <b>Semi-automatic bottle washing</b>                            | 1        | pc.          |                                                          |
| <i>Weight</i>                                                   | 12.5     | kg           | Washing machine made of food grade stainless steel (304) |
| <i>Load capacity</i>                                            | 400      | bottles/hrs. |                                                          |
| <i>Water consumption per 400 bottles</i>                        | 50       | L            |                                                          |
| <b>Water pump</b>                                               | 115      | V            |                                                          |
|                                                                 | 60       | Hz           |                                                          |
|                                                                 | 3400     | rpm          |                                                          |
|                                                                 | 0.5      | hp           |                                                          |

| 3. Inputs and Outputs                                           |               |       |                                                          |
|-----------------------------------------------------------------|---------------|-------|----------------------------------------------------------|
| Bottling                                                        |               |       |                                                          |
| Stage description                                               | Quantity      | Units | Notes                                                    |
|                                                                 | Inputs        |       |                                                          |
| <b>Water heating equipment</b>                                  | 1             | pc.   | It is used for pre-washing of bottles                    |
| LPG tank (10 kg)                                                | 1             | pc.   |                                                          |
| <i>Average useful life</i>                                      | 10            | yr.   |                                                          |
| <i>LPG tank weight</i>                                          | 7.8           | kg    |                                                          |
| <i>LPG consumption</i>                                          | 10            | kg    |                                                          |
| Heavy-duty single burner propane stove                          | 1             | pc.   | It is made of black steel                                |
| <i>Weight</i>                                                   | 5.6           | kg    |                                                          |
| <i>Average useful life</i>                                      | 5             | yr.   |                                                          |
| 1200 H-O aluminum container                                     | 1             | pc.   |                                                          |
| <i>Weight</i>                                                   | 1.68          | kg    |                                                          |
| <i>Average useful life</i>                                      | 4             | yr.   |                                                          |
| <b>Semi-automatic liquid filling machine</b>                    | 1             | pc.   | Filling capacity: 200 bottles per hour                   |
| <i>Electric motor</i>                                           | 1             | pc.   |                                                          |
|                                                                 | 1/4           | hp    |                                                          |
|                                                                 | 0.187         | kW    |                                                          |
|                                                                 | 127           | V     |                                                          |
| <i>Average useful life</i>                                      | 15            | yr.   |                                                          |
| <i>Weight of filling machine</i>                                | 55            | kg    | Washing machine made of food grade stainless steel (304) |
| <i>The operation hours of the machine</i>                       | 14            | hrs.  |                                                          |
| Stainless steel tank (300 L)                                    | 2             | pcs.  |                                                          |
| <i>Weight</i>                                                   | 24.5          | kg    |                                                          |
| <i>Distilled water</i>                                          | 125           | L     |                                                          |
| <i>The transportation of distilled water by truck</i>           | 36            | km    | Distance travelled                                       |
| <i>White glass bottle (1 pc)</i>                                | 0.844 – 0.878 | kg    |                                                          |
| <i>Wooden caps (1 pc)</i>                                       | 0.028         | kg    |                                                          |
| <i>Synthetic cork made from low-density polyethylene (1 pc)</i> | 0.007         | kg    |                                                          |

| 3. Inputs and Outputs                                                                                                    |               |            |                                                       |
|--------------------------------------------------------------------------------------------------------------------------|---------------|------------|-------------------------------------------------------|
| Bottling                                                                                                                 |               |            |                                                       |
| Stage description                                                                                                        | Quantity      | Units      | Notes                                                 |
|                                                                                                                          | <b>Inputs</b> |            |                                                       |
| Quantity of white glass bottles, wooden caps, synthetic cork purchased                                                   | 10000         | pcs. /yr.  |                                                       |
| Quantity of labels purchased                                                                                             | 20,000        | pcs. / yr. |                                                       |
| <i>The transportation of glass bottle, wooden cap, synthetic cork, labels, heat shrink seals, and RSC boxes by truck</i> | 1,628         | km/yr.     |                                                       |
| Ixtle loop used per bottle                                                                                               | 1.13          | m          |                                                       |
| <i>Weight</i>                                                                                                            | 0.003         | kg         |                                                       |
| <i>The transportation of ixtle loop by truck</i>                                                                         | 36            | km         |                                                       |
| Heat gun                                                                                                                 | 1             | pc.        |                                                       |
| <i>Power</i>                                                                                                             | 1400          | W          |                                                       |
| <i>Average useful life</i>                                                                                               | 5             | yr.        |                                                       |
| Heat shrinks seals for bottles (70 mm X 90 mm)                                                                           | 1             | pc.        |                                                       |
| <i>Weight</i>                                                                                                            | <1            | gm         |                                                       |
| Silicone hot glue gun (12.7 mm)                                                                                          | 1             | pc.        |                                                       |
| <i>Capacity</i>                                                                                                          | 127           | V          |                                                       |
|                                                                                                                          | 60            | Hz         |                                                       |
|                                                                                                                          | 25            | W          |                                                       |
| Glue sticks                                                                                                              | 20            | pcs.       |                                                       |
| Weight for piece                                                                                                         | 0.373         | kg         |                                                       |
| Packaging                                                                                                                |               |            |                                                       |
| Wooden skid                                                                                                              | 50            | pcs.       |                                                       |
| <i>Weight for a piece (average)</i>                                                                                      | 19            | kg         |                                                       |
| <i>Average useful life</i>                                                                                               | 5             | yr.        |                                                       |
| RSC boxes                                                                                                                | 151           | pcs.       | The holding capacity for an RCS box is twelve bottles |
| <i>Weight for a piece</i>                                                                                                | 0.44 – 0.48   | kg         |                                                       |
| <i>The amount of RCS boxes purchased</i>                                                                                 | 834           | pcs. /yr.  |                                                       |



| 3. Inputs and Outputs                    |          |       |       |
|------------------------------------------|----------|-------|-------|
| Vinata facilities                        |          |       |       |
| Stage description                        | Quantity | Units | Notes |
| Inputs                                   |          |       |       |
| <b>Spotlights to illuminate</b>          | 11       | pcs.  |       |
| Duration of use                          | 30       | hrs.  |       |
| <i>Capacity</i>                          | 25       | W     |       |
| <b>Electric motor for air extractors</b> | 3        | pcs.  |       |
| <i>Capacity</i>                          | 0.5      | hp    |       |
|                                          | 50/60    | Hz    |       |
|                                          | 1625     | rpm   |       |
| <i>Average useful life</i>               | 5        | yr.   |       |
| <b>Computer equipment</b>                | 1        | pc.   |       |
| <i>Technical specifications</i>          | 1        | pc.   |       |
|                                          | 50 - 60  | Hz    |       |
|                                          | 1.30     | A     |       |
|                                          | 2.31     | A     |       |
|                                          | 19.50    | V CC  |       |
| <i>Average useful life</i>               | 4        | yr.   |       |
