# Supplementary material
Source: MDPI journal article supplement (https://www.mdpi.com/2077-0472/12/12/2159)
Supplement: s1 [file s1]

Archive with 2 entries (2 files):
- S1 Supporting information.pdf
- S2 Sotol Industrial 750 ml.xlsx
