# Supplementary material
Source: MDPI journal article supplement (https://www.mdpi.com/2077-0472/12/12/2159)
Supplement: s1 [file s1 › S2 Sotol Industrial 750 ml.xlsx]

## Sheet: Title
SUPPORTING INFORMATION FOR:
Madrid-Solórzano, J.M., García-Alcaraz, J.L., Jiménez Macías, E. & Blanco Fernández, J. (2022). Environmental impact assessment of industrial sotol production in México.
This supporting information provides the LCA findings for each type of sotol: white, rested, and aged. The value for each impact category is arranged in decreasing orders.

## Sheet: ORIGINALES
SimaPro 8.5.2.0	Análisis de impacto	Fecha:	2021-04-27	Período:	01:17:20.473000
Proyecto	Sotol
Calculation:	Analizar
Results:	Evaluación del impacto
Product:	1 p Botella750ml_Ind (of project Sotol)
Método:	CML-IA baseline V3.05 / EU25
Indicador:	Caracterización
Skip categories:	Nunca
Excluir procesos de infrastructura:	No
Excluir emisiones a largo plazo:	No
Sorted on item:	Categoría de impacto
Sort order:	Ascendente
SOTOL BLANCO
Categoría de impacto	Unidad	Total	Cosecha_Ind	Cocimiento_Ind	Molienda_Ind	Fermentacion_Ind	Destilacion_Ind	Envasado_Ind_blanco	Embalaje_Ind
Abiotic depletion	kg Sb eq	2.30072e-05	1.33817e-05	1.28696e-06	6.12144e-07	3.16267e-07	6.78149e-07	6.6608e-06	7.12262e-08
Abiotic depletion (fossil fuels)	MJ	72.1189	34.7171	12.2423	1.04013	0.12131	0.169123	23.3216	0.507392
Global warming (GWP100a)	kg CO2 eq	5.07842	2.40938	0.792986	0.0851592	0.01232	0.0158568	1.72183	0.0408904
Ozone layer depletion (ODP)	kg CFC-11 eq	7.32065e-07	4.07001e-07	8.7401e-08	5.90179e-09	5.80844e-10	7.72597e-10	2.27023e-07	3.38433e-09
Human toxicity	kg 1,4-DB eq	3.24064	0.868532	0.671127	0.300044	0.194725	0.203699	0.985477	0.0170324
Fresh water aquatic ecotox.	kg 1,4-DB eq	1.03857	0.345077	0.154205	0.0931762	0.0360203	0.0471102	0.338228	0.0247493
Marine aquatic ecotoxicity	kg 1,4-DB eq	3539.42	1078.09	237.947	137.638	40.3325	79.9951	1855.13	110.282
Terrestrial ecotoxicity	kg 1,4-DB eq	0.00929089	0.00368943	0.00133179	0.000795734	0.000233925	0.000303061	0.00270951	0.000227446
Photochemical oxidation	kg C2H4 eq	0.000942405	0.000400462	9.4429e-05	2.07625e-05	4.21615e-06	8.14661e-06	0.000406227	8.16155e-06
Acidification	kg SO2 eq	0.0168467	0.00609978	0.00105733	0.000401619	6.76152e-05	0.000148339	0.00894043	0.00013161
Eutrophication	kg PO4--- eq	0.00367095	0.00144354	0.000269076	0.00016808	2.06038e-05	7.44073e-05	0.00160577	8.94714e-05
SOTOL REPOSADO
Categoría de impacto	Unidad	Total	Cosecha_Ind	Cocimiento_Ind	Molienda_Ind	Fermentacion_Ind	Destilacion_Ind	Envasado_Ind_Reposado	Embalaje_Ind
Abiotic depletion	kg Sb eq	2.32813e-05	1.33817e-05	1.28696e-06	6.12144e-07	3.16267e-07	6.78149e-07	6.93489e-06	7.12262e-08
Abiotic depletion (fossil fuels)	MJ	72.8104	34.7171	12.2423	1.04013	0.12131	0.169123	24.0131	0.507392
Global warming (GWP100a)	kg CO2 eq	5.12668	2.40938	0.792986	0.0851592	0.01232	0.0158568	1.77009	0.0408904
Ozone layer depletion (ODP)	kg CFC-11 eq	7.4011e-07	4.07001e-07	8.7401e-08	5.90179e-09	5.80844e-10	7.72597e-10	2.35068e-07	3.38433e-09
Human toxicity	kg 1,4-DB eq	3.26797	0.868532	0.671127	0.300044	0.194725	0.203699	1.01281	0.0170324
Fresh water aquatic ecotox.	kg 1,4-DB eq	1.04705	0.345077	0.154205	0.0931762	0.0360203	0.0471102	0.346708	0.0247493
Marine aquatic ecotoxicity	kg 1,4-DB eq	3562.9	1078.09	237.947	137.638	40.3325	79.9951	1878.61	110.282
Terrestrial ecotoxicity	kg 1,4-DB eq	0.00937922	0.00368943	0.00133179	0.000795734	0.000233925	0.000303061	0.00279784	0.000227446
Photochemical oxidation	kg C2H4 eq	0.000950858	0.000400462	9.4429e-05	2.07625e-05	4.21615e-06	8.14661e-06	0.00041468	8.16155e-06
Acidification	kg SO2 eq	0.0169729	0.00609978	0.00105733	0.000401619	6.76152e-05	0.000148339	0.00906663	0.00013161
Eutrophication	kg PO4--- eq	0.00370124	0.00144354	0.000269076	0.00016808	2.06038e-05	7.44073e-05	0.00163606	8.94714e-05

## Sheet: ordenados
SOTOL BLANCO
Categoría de impacto	Unidad	Cosecha_Ind	Cocimiento_Ind	Molienda_Ind	Fermentacion_Ind	Destilacion_Ind	Envasado_Ind_blanco	Embalaje_Ind	Total
Marine aquatic ecotoxicity	kg 1,4-DB eq	1078.09	237.947	137.638	40.3325	79.9951	1855.13	110.282	3539.42
Abiotic depletion (fossil fuels)	MJ	34.7171	12.2423	1.04013	0.12131	0.169123	23.3216	0.507392	72.1189
Global warming (GWP100a)	kg CO2 eq	2.40938	0.792986	0.0851592	0.01232	0.0158568	1.72183	0.0408904	5.07842
Human toxicity	kg 1,4-DB eq	0.868532	0.671127	0.300044	0.194725	0.203699	0.985477	0.0170324	3.24064
Fresh water aquatic ecotox.	kg 1,4-DB eq	0.345077	0.154205	0.0931762	0.0360203	0.0471102	0.338228	0.0247493	1.03857
Acidification	kg SO2 eq	0.00609978	0.00105733	0.000401619	6.76152e-05	0.000148339	0.00894043	0.00013161	0.0168467
Terrestrial ecotoxicity	kg 1,4-DB eq	0.00368943	0.00133179	0.000795734	0.000233925	0.000303061	0.00270951	0.000227446	0.00929089
Eutrophication	kg PO4--- eq	0.00144354	0.000269076	0.00016808	2.06038e-05	7.44073e-05	0.00160577	8.94714e-05	0.00367095
Photochemical oxidation	kg C2H4 eq	0.000400462	9.4429e-05	2.07625e-05	4.21615e-06	8.14661e-06	0.000406227	8.16155e-06	0.000942405
Abiotic depletion	kg Sb eq	1.33817e-05	1.28696e-06	6.12144e-07	3.16267e-07	6.78149e-07	6.6608e-06	7.12262e-08	2.30072e-05
Ozone layer depletion (ODP)	kg CFC-11 eq	4.07001e-07	8.7401e-08	5.90179e-09	5.80844e-10	7.72597e-10	2.27023e-07	3.38433e-09	7.32065e-07
SOTOL REPOSADO
Categoría de impacto	Unidad	Cosecha_Ind	Cocimiento_Ind	Molienda_Ind	Fermentacion_Ind	Destilacion_Ind	Envasado_Ind_Reposado	Embalaje_Ind	Total
Marine aquatic ecotoxicity	kg 1,4-DB eq	1078.09	237.947	137.638	40.3325	79.9951	1878.61	110.282	3562.9
Abiotic depletion (fossil fuels)	MJ	34.7171	12.2423	1.04013	0.12131	0.169123	24.0131	0.507392	72.8104
Global warming (GWP100a)	kg CO2 eq	2.40938	0.792986	0.0851592	0.01232	0.0158568	1.77009	0.0408904	5.12668
Human toxicity	kg 1,4-DB eq	0.868532	0.671127	0.300044	0.194725	0.203699	1.01281	0.0170324	3.26797
Fresh water aquatic ecotox.	kg 1,4-DB eq	0.345077	0.154205	0.0931762	0.0360203	0.0471102	0.346708	0.0247493	1.04705
Acidification	kg SO2 eq	0.00609978	0.00105733	0.000401619	6.76152e-05	0.000148339	0.00906663	0.00013161	0.0169729
Terrestrial ecotoxicity	kg 1,4-DB eq	0.00368943	0.00133179	0.000795734	0.000233925	0.000303061	0.00279784	0.000227446	0.00937922
Eutrophication	kg PO4--- eq	0.00144354	0.000269076	0.00016808	2.06038e-05	7.44073e-05	0.00163606	8.94714e-05	0.00370124
Photochemical oxidation	kg C2H4 eq	0.000400462	9.4429e-05	2.07625e-05	4.21615e-06	8.14661e-06	0.00041468	8.16155e-06	0.000950858
Abiotic depletion	kg Sb eq	1.33817e-05	1.28696e-06	6.12144e-07	3.16267e-07	6.78149e-07	6.93489e-06	7.12262e-08	2.32813e-05
Ozone layer depletion (ODP)	kg CFC-11 eq	4.07001e-07	8.7401e-08	5.90179e-09	5.80844e-10	7.72597e-10	2.35068e-07	3.38433e-09	7.4011e-07
SOTOL AÑEJO
Categoría de impacto	Unidad	Cosecha_Ind	Cocimiento_Ind	Molienda_Ind	Fermentacion_Ind	Destilacion_Ind	Envasado_Ind_anejo	Embalaje_Ind	Total
Marine aquatic ecotoxicity	kg 1,4-DB eq	1078.09	237.947	137.638	40.3325	79.9951	1887.13	110.282	3571.41
Abiotic depletion (fossil fuels)	MJ	34.7171	12.2423	1.04013	0.12131	0.169123	24.0565	0.507392	72.8538
Global warming (GWP100a)	kg CO2 eq	2.40938	0.792986	0.0851592	0.01232	0.0158568	1.77404	0.0408904	5.13063
Human toxicity	kg 1,4-DB eq	0.868532	0.671127	0.300044	0.194725	0.203699	1.04608	0.0170324	3.30124
Fresh water aquatic ecotox.	kg 1,4-DB eq	0.345077	0.154205	0.0931762	0.0360203	0.0471102	0.353243	0.0247493	1.05358
Acidification	kg SO2 eq	0.00609978	0.00105733	0.000401619	6.76152e-05	0.000148339	0.00908873	0.00013161	0.016995
Terrestrial ecotoxicity	kg 1,4-DB eq	0.00368943	0.00133179	0.000795734	0.000233925	0.000303061	0.00284654	0.000227446	0.00942793
Eutrophication	kg PO4--- eq	0.00144354	0.000269076	0.00016808	2.06038e-05	7.44073e-05	0.00164299	8.94714e-05	0.00370817
Photochemical oxidation	kg C2H4 eq	0.000400462	9.4429e-05	2.07625e-05	4.21615e-06	8.14661e-06	0.000416726	8.16155e-06	0.000952905
Abiotic depletion	kg Sb eq	1.33817e-05	1.28696e-06	6.12144e-07	3.16267e-07	6.78149e-07	6.99403e-06	7.12262e-08	2.33404e-05
Ozone layer depletion (ODP)	kg CFC-11 eq	4.07001e-07	8.7401e-08	5.90179e-09	5.80844e-10	7.72597e-10	2.35369e-07	3.38433e-09	7.40411e-07

## Sheet: Porcentajes
SOTOL BLANCO
Categoría de impacto	Unidad	Cosecha_Ind	Cocimiento_Ind	Molienda_Ind	Fermentacion_Ind	Destilacion_Ind	Envasado_Ind_blanco	Embalaje_Ind	Total
Marine aquatic ecotoxicity	kg 1,4-DB eq	1078.09	237.947	137.638	40.3325	79.9951	1855.13	110.282	3539.42
		30.4595	6.72278	3.88871	1.13952	2.26012	52.4136	3.11583
Abiotic depletion (fossil fuels)	MJ	34.7171	12.2423	1.04013	0.12131	0.169123	23.3216	0.507392	72.1189
		48.1387	16.9751	1.44224	0.168209	0.234505	32.3377	0.703548
Global warming (GWP100a)	kg CO2 eq	2.40938	0.792986	0.0851592	0.01232	0.0158568	1.72183	0.0408904	5.07842
		47.4435	15.6148	1.67688	0.242595	0.312239	33.9048	0.805179
Human toxicity	kg 1,4-DB eq	0.868532	0.671127	0.300044	0.194725	0.203699	0.985477	0.0170324	3.24064
		26.8013	20.7097	9.25879	6.00886	6.28578	30.41	0.525589
Fresh water aquatic ecotox.	kg 1,4-DB eq	0.345077	0.154205	0.0931762	0.0360203	0.0471102	0.338228	0.0247493	1.03857
		33.2263	14.8478	8.97162	3.46828	4.53608	32.5669	2.38303
Acidification	kg SO2 eq	0.00609978	0.00105733	0.000401619	6.76152e-05	0.000148339	0.00894043	0.00013161	0.0168467
		36.2075	6.27616	2.38396	0.401356	0.880522	53.0693	0.781223
Terrestrial ecotoxicity	kg 1,4-DB eq	0.00368943	0.00133179	0.000795734	0.000233925	0.000303061	0.00270951	0.000227446	0.00929089
		39.7102	14.3343	8.56467	2.51779	3.26191	29.163	2.44805
Eutrophication	kg PO4--- eq	0.00144354	0.000269076	0.00016808	2.06038e-05	7.44073e-05	0.00160577	8.94714e-05	0.00367095
		39.3235	7.32987	4.57865	0.561265	2.02692	43.7426	2.43728
Photochemical oxidation	kg C2H4 eq	0.000400462	9.4429e-05	2.07625e-05	4.21615e-06	8.14661e-06	0.000406227	8.16155e-06	0.000942405
		42.4937	10.02	2.20314	0.447383	0.864449	43.1053	0.866035
Abiotic depletion	kg Sb eq	1.33817e-05	1.28696e-06	6.12144e-07	3.16267e-07	6.78149e-07	6.6608e-06	7.12262e-08	2.30072e-05
		58.1629	5.59374	2.66066	1.37464	2.94755	28.9509	0.309582
Ozone layer depletion (ODP)	kg CFC-11 eq	4.07001e-07	8.7401e-08	5.90179e-09	5.80844e-10	7.72597e-10	2.27023e-07	3.38433e-09	7.32065e-07
		55.5963	11.939	0.806184	0.0793433	0.105537	31.0114	0.462299
SOTOL REPOSADO
Categoría de impacto	Unidad	Cosecha_Ind	Cocimiento_Ind	Molienda_Ind	Fermentacion_Ind	Destilacion_Ind	Envasado_Ind_Reposado	Embalaje_Ind	Total
Marine aquatic ecotoxicity	kg 1,4-DB eq	1078.09	237.947	137.638	40.3325	79.9951	1878.61	110.282	3562.9
		30.2587	6.67847	3.86308	1.13201	2.24523	52.7272	3.0953
Abiotic depletion (fossil fuels)	MJ	34.7171	12.2423	1.04013	0.12131	0.169123	24.0131	0.507392	72.8104
		47.6815	16.8139	1.42854	0.166611	0.232278	32.9803	0.696867
Global warming (GWP100a)	kg CO2 eq	2.40938	0.792986	0.0851592	0.01232	0.0158568	1.77009	0.0408904	5.12668
		46.9968	15.4678	1.6611	0.240311	0.3093	34.5271	0.797599
Human toxicity	kg 1,4-DB eq	0.868532	0.671127	0.300044	0.194725	0.203699	1.01281	0.0170324	3.26797
		26.5771	20.5365	9.18135	5.9586	6.23321	30.992	0.521193
Fresh water aquatic ecotox.	kg 1,4-DB eq	0.345077	0.154205	0.0931762	0.0360203	0.0471102	0.346708	0.0247493	1.04705
		32.9572	14.7276	8.89896	3.44019	4.49934	33.113	2.36373
Acidification	kg SO2 eq	0.00609978	0.00105733	0.000401619	6.76152e-05	0.000148339	0.00906663	0.00013161	0.0169729
		35.9383	6.22949	2.36624	0.398371	0.873975	53.4182	0.775414
Terrestrial ecotoxicity	kg 1,4-DB eq	0.00368943	0.00133179	0.000795734	0.000233925	0.000303061	0.00279784	0.000227446	0.00937922
		39.3362	14.1993	8.484	2.49408	3.23119	29.8302	2.42499
Eutrophication	kg PO4--- eq	0.00144354	0.000269076	0.00016808	2.06038e-05	7.44073e-05	0.00163606	8.94714e-05	0.00370124
		39.0016	7.26989	4.54119	0.556672	2.01034	44.2029	2.41734
Photochemical oxidation	kg C2H4 eq	0.000400462	9.4429e-05	2.07625e-05	4.21615e-06	8.14661e-06	0.00041468	8.16155e-06	0.000950858
		42.1159	9.93092	2.18355	0.443405	0.856764	43.6111	0.858336
Abiotic depletion	kg Sb eq	1.33817e-05	1.28696e-06	6.12144e-07	3.16267e-07	6.78149e-07	6.93489e-06	7.12262e-08	2.32813e-05
		3.11542e-12	2.99622e-13	1.42515e-13	7.3631e-14	1.57882e-13	1.61453e-12	1.65824e-14
Ozone layer depletion (ODP)	kg CFC-11 eq	4.07001e-07	8.7401e-08	5.90179e-09	5.80844e-10	7.72597e-10	2.35068e-07	3.38433e-09	7.4011e-07
		54.992	11.8092	0.797421	0.0784808	0.10439	31.7612	0.457274
SOTOL AÑEJO
Categoría de impacto	Unidad	Cosecha_Ind	Cocimiento_Ind	Molienda_Ind	Fermentacion_Ind	Destilacion_Ind	Envasado_Ind_anejo	Embalaje_Ind	Total
Marine aquatic ecotoxicity	kg 1,4-DB eq	1078.09	237.947	137.638	40.3325	79.9951	1887.13	110.282	3571.41
		30.1866	6.66255	3.85387	1.12931	2.23987	52.8399	3.08791
Abiotic depletion (fossil fuels)	MJ	34.7171	12.2423	1.04013	0.12131	0.169123	24.0565	0.507392	72.8538
		47.6531	16.8039	1.42769	0.166512	0.23214	33.0203	0.696451
Global warming (GWP100a)	kg CO2 eq	2.40938	0.792986	0.0851592	0.01232	0.0158568	1.77404	0.0408904	5.13063
		46.9606	15.4559	1.65982	0.240126	0.309061	34.5775	0.796985
Human toxicity	kg 1,4-DB eq	0.868532	0.671127	0.300044	0.194725	0.203699	1.04608	0.0170324	3.30124
		26.3093	20.3296	9.08882	5.89855	6.17039	31.6875	0.515941
Fresh water aquatic ecotox.	kg 1,4-DB eq	0.345077	0.154205	0.0931762	0.0360203	0.0471102	0.353243	0.0247493	1.05358
		32.7528	14.6362	8.84376	3.41885	4.47144	33.5279	2.34907
Acidification	kg SO2 eq	0.00609978	0.00105733	0.000401619	6.76152e-05	0.000148339	0.00908873	0.00013161	0.016995
		35.8916	6.22139	2.36316	0.397853	0.872839	53.4788	0.774405
Terrestrial ecotoxicity	kg 1,4-DB eq	0.00368943	0.00133179	0.000795734	0.000233925	0.000303061	0.00284654	0.000227446	0.00942793
		39.133	14.126	8.44018	2.4812	3.2145	30.1927	2.41247
Eutrophication	kg PO4--- eq	0.00144354	0.000269076	0.00016808	2.06038e-05	7.44073e-05	0.00164299	8.94714e-05	0.00370817
		38.9288	7.2563	4.5327	0.555632	2.00658	44.3072	2.41282
Photochemical oxidation	kg C2H4 eq	0.000400462	9.4429e-05	2.07625e-05	4.21615e-06	8.14661e-06	0.000416726	8.16155e-06	0.000952905
		42.0254	9.9096	2.17886	0.442453	0.854924	43.7322	0.856492
Abiotic depletion	kg Sb eq	1.33817e-05	1.28696e-06	6.12144e-07	3.16267e-07	6.78149e-07	6.99403e-06	7.12262e-08	2.33404e-05
		57.3325	5.51387	2.62267	1.35502	2.90547	29.9653	0.305162
Ozone layer depletion (ODP)	kg CFC-11 eq	4.07001e-07	8.7401e-08	5.90179e-09	5.80844e-10	7.72597e-10	2.35369e-07	3.38433e-09	7.40411e-07
		54.9696	11.8044	0.797097	0.0784489	0.104347	31.789	0.457088

## Sheet: Results
WHITE SOTOL				RESTED SOTOL				AGED SOTOL				Differences rate between impact categories by sotol type-related
(diluted with distilled water)				(stored for four months in barrels)				(stored for four months in barrels)				Similarity	Differences (%)
TOTAL IMPACT				TOTAL IMPACT				TOTAL IMPACT				TOTAL IMPACT
Impact categories	Unit	Total		Impact categories	Unit	Total		Impact categories	Unit	Total
Marine aquatic ecotoxicity potential (MAETP)	kg 1,4-DB eq	3539.42		Marine aquatic ecotoxicity potential (MAETP)	kg 1,4-DB eq	3562.9		Marine aquatic ecotoxicity potential (MAETP)	kg 1,4-DB eq	3571.41		99.1041	0.895919
Fossil depletion potential (FDP)	MJ	72.1189		Fossil depletion potential (FDP)	MJ	72.8104		Fossil depletion potential (FDP)	MJ	72.8538		98.9912	1.00877
Global warming potential (GWP)	kg CO2 eq	5.07842		Global warming potential (GWP)	kg CO2 eq	5.12668		Global warming potential (GWP)	kg CO2 eq	5.13063		98.9823	1.01771
Human toxicity potential (HTP)	kg 1,4-DB eq	3.24064		Human toxicity potential (HTP)	kg 1,4-DB eq	3.26797		Human toxicity potential (HTP)	kg 1,4-DB eq	3.30124		98.1642	1.83576
Fresh water aquatic ecotoxicity potential (FAETP)	kg 1,4-DB eq	1.03857		Fresh water aquatic ecotoxicity potential (FAETP)	kg 1,4-DB eq	1.04705		Fresh water aquatic ecotoxicity potential (FAETP)	kg 1,4-DB eq	1.05358		98.5749	1.42513
Acidification potential (AP)	kg SO2 eq	0.0168467		Acidification potential (AP)	kg SO2 eq	0.0169729		Acidification potential (AP)	kg SO2 eq	0.016995		99.1274	0.872646
Terrestrial ecotoxicity potential (TETP)	kg 1,4-DB eq	0.00929089		Terrestrial ecotoxicity potential (TETP)	kg 1,4-DB eq	0.00937922		Terrestrial ecotoxicity potential (TETP)	kg 1,4-DB eq	0.00942793		98.5465	1.45354
Eutrophication potential (EP)	kg PO4--- eq	0.00367095		Eutrophication potential (EP)	kg PO4--- eq	0.00370124		Eutrophication potential (EP)	kg PO4--- eq	0.00370817		98.9963	1.00372
Photochemical oxidation potential (POCP)	kg C2H4 eq	0.000942405		Photochemical oxidation potential (POCP)	kg C2H4 eq	0.000950858		Photochemical oxidation potential (POCP)	kg C2H4 eq	0.000952905		98.8981	1.10188
Abiotic depletion potential (ADP)	kg Sb eq	2.30072e-05		Abiotic depletion potential (ADP)	kg Sb eq	2.32813e-05		Abiotic depletion potential (ADP)	kg Sb eq	2.33404e-05		98.5723	1.4277
Ozone layer depletion (ODP)	kg CFC-11 eq	7.32065e-07		Ozone layer depletion (ODP)	kg CFC-11 eq	7.4011e-07		Ozone layer depletion (ODP)	kg CFC-11 eq	7.40411e-07		98.8728	1.1272
HARVEST				HARVEST				HARVEST
Marine aquatic ecotoxicity potential (MAETP)	kg 1,4-DB eq	1078.09		Marine aquatic ecotoxicity potential (MAETP)	kg 1,4-DB eq	1078.09		Marine aquatic ecotoxicity potential (MAETP)	kg 1,4-DB eq	1078.09		100	0
Fossil depletion potential (FDP)	MJ	34.7171		Fossil depletion potential (FDP)	MJ	34.7171		Fossil depletion potential (FDP)	MJ	34.7171		100	0
Global warming potential (GWP)	kg CO2 eq	2.40938		Global warming potential (GWP)	kg CO2 eq	2.40938		Global warming potential (GWP)	kg CO2 eq	2.40938		100	0
Human toxicity potential (HTP)	kg 1,4-DB eq	0.868532		Human toxicity potential (HTP)	kg 1,4-DB eq	0.868532		Human toxicity potential (HTP)	kg 1,4-DB eq	0.868532		100	0
Fresh water aquatic ecotoxicity potential (FAETP)	kg 1,4-DB eq	0.345077		Fresh water aquatic ecotoxicity potential (FAETP)	kg 1,4-DB eq	0.345077		Fresh water aquatic ecotoxicity potential (FAETP)	kg 1,4-DB eq	0.345077		100	0
Acidification potential (AP)	kg SO2 eq	0.00609978		Acidification potential (AP)	kg SO2 eq	0.00609978		Acidification potential (AP)	kg SO2 eq	0.00609978		100	0
Terrestrial ecotoxicity potential (TETP)	kg 1,4-DB eq	0.00368943		Terrestrial ecotoxicity potential (TETP)	kg 1,4-DB eq	0.00368943		Terrestrial ecotoxicity potential (TETP)	kg 1,4-DB eq	0.00368943		100	0
Eutrophication potential (EP)	kg PO4--- eq	0.00144354		Eutrophication potential (EP)	kg PO4--- eq	0.00144354		Eutrophication potential (EP)	kg PO4--- eq	0.00144354		100	0
Photochemical oxidation potential (POCP)	kg C2H4 eq	0.000400462		Photochemical oxidation potential (POCP)	kg C2H4 eq	0.000400462		Photochemical oxidation potential (POCP)	kg C2H4 eq	0.000400462		100	0
Abiotic depletion potential (ADP)	kg Sb eq	1.33817e-05		Abiotic depletion potential (ADP)	kg Sb eq	1.33817e-05		Abiotic depletion potential (ADP)	kg Sb eq	1.33817e-05		100	0
Ozone layer depletion (ODP)	kg CFC-11 eq	4.07001e-07		Ozone layer depletion (ODP)	kg CFC-11 eq	4.07001e-07		Ozone layer depletion (ODP)	kg CFC-11 eq	4.07001e-07		100	0
COOKING				COOKING				COOKING
Marine aquatic ecotoxicity potential (MAETP)	kg 1,4-DB eq	237.947		Marine aquatic ecotoxicity potential (MAETP)	kg 1,4-DB eq	237.947		Marine aquatic ecotoxicity potential (MAETP)	kg 1,4-DB eq	237.947		100	0
Fossil depletion potential (FDP)	MJ	12.2423		Fossil depletion potential (FDP)	MJ	12.2423		Fossil depletion potential (FDP)	MJ	12.2423		100	0
Global warming potential (GWP)	kg CO2 eq	0.792986		Global warming potential (GWP)	kg CO2 eq	0.792986		Global warming potential (GWP)	kg CO2 eq	0.792986		100	0
Human toxicity potential (HTP)	kg 1,4-DB eq	0.671127		Human toxicity potential (HTP)	kg 1,4-DB eq	0.671127		Human toxicity potential (HTP)	kg 1,4-DB eq	0.671127		100	0
Fresh water aquatic ecotoxicity potential (FAETP)	kg 1,4-DB eq	0.154205		Fresh water aquatic ecotoxicity potential (FAETP)	kg 1,4-DB eq	0.154205		Fresh water aquatic ecotoxicity potential (FAETP)	kg 1,4-DB eq	0.154205		100	0
Acidification potential (AP)	kg SO2 eq	0.00105733		Acidification potential (AP)	kg SO2 eq	0.00105733		Acidification potential (AP)	kg SO2 eq	0.00105733		100	0
Terrestrial ecotoxicity potential (TETP)	kg 1,4-DB eq	0.00133179		Terrestrial ecotoxicity potential (TETP)	kg 1,4-DB eq	0.00133179		Terrestrial ecotoxicity potential (TETP)	kg 1,4-DB eq	0.00133179		100	0
Eutrophication potential (EP)	kg PO4--- eq	0.000269076		Eutrophication potential (EP)	kg PO4--- eq	0.000269076		Eutrophication potential (EP)	kg PO4--- eq	0.000269076		100	0
Photochemical oxidation potential (POCP)	kg C2H4 eq	9.4429e-05		Photochemical oxidation potential (POCP)	kg C2H4 eq	9.4429e-05		Photochemical oxidation potential (POCP)	kg C2H4 eq	9.4429e-05		100	0
Abiotic depletion potential (ADP)	kg Sb eq	1.28696e-06		Abiotic depletion potential (ADP)	kg Sb eq	1.28696e-06		Abiotic depletion potential (ADP)	kg Sb eq	1.28696e-06		100	0
Ozone layer depletion (ODP)	kg CFC-11 eq	8.7401e-08		Ozone layer depletion (ODP)	kg CFC-11 eq	8.7401e-08		Ozone layer depletion (ODP)	kg CFC-11 eq	8.7401e-08		100	0
MILLING				MILLING				MILLING
Marine aquatic ecotoxicity potential (MAETP)	kg 1,4-DB eq	137.638		Marine aquatic ecotoxicity potential (MAETP)	kg 1,4-DB eq	137.638		Marine aquatic ecotoxicity potential (MAETP)	kg 1,4-DB eq	137.638		100	0
Fossil depletion potential (FDP)	MJ	1.04013		Fossil depletion potential (FDP)	MJ	1.04013		Fossil depletion potential (FDP)	MJ	1.04013		100	0
Global warming potential (GWP)	kg CO2 eq	0.0851592		Global warming potential (GWP)	kg CO2 eq	0.0851592		Global warming potential (GWP)	kg CO2 eq	0.0851592		100	0
Human toxicity potential (HTP)	kg 1,4-DB eq	0.300044		Human toxicity potential (HTP)	kg 1,4-DB eq	0.300044		Human toxicity potential (HTP)	kg 1,4-DB eq	0.300044		100	0
Fresh water aquatic ecotoxicity potential (FAETP)	kg 1,4-DB eq	0.0931762		Fresh water aquatic ecotoxicity potential (FAETP)	kg 1,4-DB eq	0.0931762		Fresh water aquatic ecotoxicity potential (FAETP)	kg 1,4-DB eq	0.0931762		100	0
Acidification potential (AP)	kg SO2 eq	0.000401619		Acidification potential (AP)	kg SO2 eq	0.000401619		Acidification potential (AP)	kg SO2 eq	0.000401619		100	0
Terrestrial ecotoxicity potential (TETP)	kg 1,4-DB eq	0.000795734		Terrestrial ecotoxicity potential (TETP)	kg 1,4-DB eq	0.000795734		Terrestrial ecotoxicity potential (TETP)	kg 1,4-DB eq	0.000795734		100	0
Eutrophication potential (EP)	kg PO4--- eq	0.00016808		Eutrophication potential (EP)	kg PO4--- eq	0.00016808		Eutrophication potential (EP)	kg PO4--- eq	0.00016808		100	0
Photochemical oxidation potential (POCP)	kg C2H4 eq	2.07625e-05		Photochemical oxidation potential (POCP)	kg C2H4 eq	2.07625e-05		Photochemical oxidation potential (POCP)	kg C2H4 eq	2.07625e-05		100	0
Abiotic depletion potential (ADP)	kg Sb eq	6.12144e-07		Abiotic depletion potential (ADP)	kg Sb eq	6.12144e-07		Abiotic depletion potential (ADP)	kg Sb eq	6.12144e-07		100	0
Ozone layer depletion (ODP)	kg CFC-11 eq	5.90179e-09		Ozone layer depletion (ODP)	kg CFC-11 eq	5.90179e-09		Ozone layer depletion (ODP)	kg CFC-11 eq	5.90179e-09		100	0
FERMENTATION				FERMENTATION				FERMENTATION
Marine aquatic ecotoxicity potential (MAETP)	kg 1,4-DB eq	40.3325		Marine aquatic ecotoxicity potential (MAETP)	kg 1,4-DB eq	40.3325		Marine aquatic ecotoxicity potential (MAETP)	kg 1,4-DB eq	40.3325		100	0
Fossil depletion potential (FDP)	MJ	0.12131		Fossil depletion potential (FDP)	MJ	0.12131		Fossil depletion potential (FDP)	MJ	0.12131		100	0
Global warming potential (GWP)	kg CO2 eq	0.01232		Global warming potential (GWP)	kg CO2 eq	0.01232		Global warming potential (GWP)	kg CO2 eq	0.01232		100	0
Human toxicity potential (HTP)	kg 1,4-DB eq	0.194725		Human toxicity potential (HTP)	kg 1,4-DB eq	0.194725		Human toxicity potential (HTP)	kg 1,4-DB eq	0.194725		100	0
Fresh water aquatic ecotoxicity potential (FAETP)	kg 1,4-DB eq	0.0360203		Fresh water aquatic ecotoxicity potential (FAETP)	kg 1,4-DB eq	0.0360203		Fresh water aquatic ecotoxicity potential (FAETP)	kg 1,4-DB eq	0.0360203		100	0
Acidification potential (AP)	kg SO2 eq	6.76152e-05		Acidification potential (AP)	kg SO2 eq	6.76152e-05		Acidification potential (AP)	kg SO2 eq	6.76152e-05		100	0
Terrestrial ecotoxicity potential (TETP)	kg 1,4-DB eq	0.000233925		Terrestrial ecotoxicity potential (TETP)	kg 1,4-DB eq	0.000233925		Terrestrial ecotoxicity potential (TETP)	kg 1,4-DB eq	0.000233925		100	0
Eutrophication potential (EP)	kg PO4--- eq	2.06038e-05		Eutrophication potential (EP)	kg PO4--- eq	2.06038e-05		Eutrophication potential (EP)	kg PO4--- eq	2.06038e-05		100	0
Photochemical oxidation potential (POCP)	kg C2H4 eq	4.21615e-06		Photochemical oxidation potential (POCP)	kg C2H4 eq	4.21615e-06		Photochemical oxidation potential (POCP)	kg C2H4 eq	4.21615e-06		100	0
Abiotic depletion potential (ADP)	kg Sb eq	3.16267e-07		Abiotic depletion potential (ADP)	kg Sb eq	3.16267e-07		Abiotic depletion potential (ADP)	kg Sb eq	3.16267e-07		100	0
Ozone layer depletion (ODP)	kg CFC-11 eq	5.80844e-10		Ozone layer depletion (ODP)	kg CFC-11 eq	5.80844e-10		Ozone layer depletion (ODP)	kg CFC-11 eq	5.80844e-10		100	0
DISTILLATION				DISTILLATION				DISTILLATION
Marine aquatic ecotoxicity potential (MAETP)	kg 1,4-DB eq	79.9951		Marine aquatic ecotoxicity potential (MAETP)	kg 1,4-DB eq	79.9951		Marine aquatic ecotoxicity potential (MAETP)	kg 1,4-DB eq	79.9951		100	0
Fossil depletion potential (FDP)	MJ	0.169123		Fossil depletion potential (FDP)	MJ	0.169123		Fossil depletion potential (FDP)	MJ	0.169123		100	0
Global warming potential (GWP)	kg CO2 eq	0.0158568		Global warming potential (GWP)	kg CO2 eq	0.0158568		Global warming potential (GWP)	kg CO2 eq	0.0158568		100	0
Human toxicity potential (HTP)	kg 1,4-DB eq	0.203699		Human toxicity potential (HTP)	kg 1,4-DB eq	0.203699		Human toxicity potential (HTP)	kg 1,4-DB eq	0.203699		100	0
Fresh water aquatic ecotoxicity potential (FAETP)	kg 1,4-DB eq	0.0471102		Fresh water aquatic ecotoxicity potential (FAETP)	kg 1,4-DB eq	0.0471102		Fresh water aquatic ecotoxicity potential (FAETP)	kg 1,4-DB eq	0.0471102		100	0
Acidification potential (AP)	kg SO2 eq	0.000148339		Acidification potential (AP)	kg SO2 eq	0.000148339		Acidification potential (AP)	kg SO2 eq	0.000148339		100	0
Terrestrial ecotoxicity potential (TETP)	kg 1,4-DB eq	0.000303061		Terrestrial ecotoxicity potential (TETP)	kg 1,4-DB eq	0.000303061		Terrestrial ecotoxicity potential (TETP)	kg 1,4-DB eq	0.000303061		100	0
Eutrophication potential (EP)	kg PO4--- eq	7.44073e-05		Eutrophication potential (EP)	kg PO4--- eq	7.44073e-05		Eutrophication potential (EP)	kg PO4--- eq	7.44073e-05		100	0
Photochemical oxidation potential (POCP)	kg C2H4 eq	8.14661e-06		Photochemical oxidation potential (POCP)	kg C2H4 eq	8.14661e-06		Photochemical oxidation potential (POCP)	kg C2H4 eq	8.14661e-06		100	0
Abiotic depletion potential (ADP)	kg Sb eq	6.78149e-07		Abiotic depletion potential (ADP)	kg Sb eq	6.78149e-07		Abiotic depletion potential (ADP)	kg Sb eq	6.78149e-07		100	0
Ozone layer depletion (ODP)	kg CFC-11 eq	7.72597e-10		Ozone layer depletion (ODP)	kg CFC-11 eq	7.72597e-10		Ozone layer depletion (ODP)	kg CFC-11 eq	7.72597e-10		100	0
BOTTLING				BOTTLING				BOTTLING
Marine aquatic ecotoxicity potential (MAETP)	kg 1,4-DB eq	1855.13		Marine aquatic ecotoxicity potential (MAETP)	kg 1,4-DB eq	1878.61		Marine aquatic ecotoxicity potential (MAETP)	kg 1,4-DB eq	1887.13		98.3045	1.69553
Fossil depletion potential (FDP)	MJ	23.3216		Fossil depletion potential (FDP)	MJ	24.0131		Fossil depletion potential (FDP)	MJ	24.0565		96.945	3.05501
Global warming potential (GWP)	kg CO2 eq	1.72183		Global warming potential (GWP)	kg CO2 eq	1.77009		Global warming potential (GWP)	kg CO2 eq	1.77404		97.0567	2.94328
Human toxicity potential (HTP)	kg 1,4-DB eq	0.985477		Human toxicity potential (HTP)	kg 1,4-DB eq	1.01281		Human toxicity potential (HTP)	kg 1,4-DB eq	1.04608		94.2067	5.79334
Fresh water aquatic ecotoxicity potential (FAETP)	kg 1,4-DB eq	0.338228		Fresh water aquatic ecotoxicity potential (FAETP)	kg 1,4-DB eq	0.346708		Fresh water aquatic ecotoxicity potential (FAETP)	kg 1,4-DB eq	0.353243		95.7494	4.25058
Acidification potential (AP)	kg SO2 eq	0.00894043		Acidification potential (AP)	kg SO2 eq	0.00906663		Acidification potential (AP)	kg SO2 eq	0.00908873		98.3682	1.63176
Terrestrial ecotoxicity potential (TETP)	kg 1,4-DB eq	0.00270951		Terrestrial ecotoxicity potential (TETP)	kg 1,4-DB eq	0.00279784		Terrestrial ecotoxicity potential (TETP)	kg 1,4-DB eq	0.00284654		95.1858	4.8142
Eutrophication potential (EP)	kg PO4--- eq	0.00160577		Eutrophication potential (EP)	kg PO4--- eq	0.00163606		Eutrophication potential (EP)	kg PO4--- eq	0.00164299		97.7346	2.26537
Photochemical oxidation potential (POCP)	kg C2H4 eq	0.000406227		Photochemical oxidation potential (POCP)	kg C2H4 eq	0.00041468		Photochemical oxidation potential (POCP)	kg C2H4 eq	0.000416726		97.4804	2.51961
Abiotic depletion potential (ADP)	kg Sb eq	6.6608e-06		Abiotic depletion potential (ADP)	kg Sb eq	6.93489e-06		Abiotic depletion potential (ADP)	kg Sb eq	6.99403e-06		95.2355	4.76452
Ozone layer depletion (ODP)	kg CFC-11 eq	2.27023e-07		Ozone layer depletion (ODP)	kg CFC-11 eq	2.35068e-07		Ozone layer depletion (ODP)	kg CFC-11 eq	2.35369e-07		96.4541	3.54588
PACKAGING				PACKAGING				PACKAGING
Marine aquatic ecotoxicity potential (MAETP)	kg 1,4-DB eq	110.282		Marine aquatic ecotoxicity potential (MAETP)	kg 1,4-DB eq	110.282		Marine aquatic ecotoxicity potential (MAETP)	kg 1,4-DB eq	110.282		100	0
Fossil depletion potential (FDP)	MJ	0.507392		Fossil depletion potential (FDP)	MJ	0.507392		Fossil depletion potential (FDP)	MJ	0.507392		100	0
Global warming potential (GWP)	kg CO2 eq	0.0408904		Global warming potential (GWP)	kg CO2 eq	0.0408904		Global warming potential (GWP)	kg CO2 eq	0.0408904		100	0
Human toxicity potential (HTP)	kg 1,4-DB eq	0.0170324		Human toxicity potential (HTP)	kg 1,4-DB eq	0.0170324		Human toxicity potential (HTP)	kg 1,4-DB eq	0.0170324		100	0
Fresh water aquatic ecotoxicity potential (FAETP)	kg 1,4-DB eq	0.0247493		Fresh water aquatic ecotoxicity potential (FAETP)	kg 1,4-DB eq	0.0247493		Fresh water aquatic ecotoxicity potential (FAETP)	kg 1,4-DB eq	0.0247493		100	0
Acidification potential (AP)	kg SO2 eq	0.00013161		Acidification potential (AP)	kg SO2 eq	0.00013161		Acidification potential (AP)	kg SO2 eq	0.00013161		100	0
Terrestrial ecotoxicity potential (TETP)	kg 1,4-DB eq	0.000227446		Terrestrial ecotoxicity potential (TETP)	kg 1,4-DB eq	0.000227446		Terrestrial ecotoxicity potential (TETP)	kg 1,4-DB eq	0.000227446		100	0
Eutrophication potential (EP)	kg PO4--- eq	8.94714e-05		Eutrophication potential (EP)	kg PO4--- eq	8.94714e-05		Eutrophication potential (EP)	kg PO4--- eq	8.94714e-05		100	0
Photochemical oxidation potential (POCP)	kg C2H4 eq	8.16155e-06		Photochemical oxidation potential (POCP)	kg C2H4 eq	8.16155e-06		Photochemical oxidation potential (POCP)	kg C2H4 eq	8.16155e-06		100	0
Abiotic depletion potential (ADP)	kg Sb eq	7.12262e-08		Abiotic depletion potential (ADP)	kg Sb eq	7.12262e-08		Abiotic depletion potential (ADP)	kg Sb eq	7.12262e-08		100	0
Ozone layer depletion (ODP)	kg CFC-11 eq	3.38433e-09		Ozone layer depletion (ODP)	kg CFC-11 eq	3.38433e-09		Ozone layer depletion (ODP)	kg CFC-11 eq	3.38433e-09		100	0
